# Supplementary material
Source: PubMed Central journal article supplement (PMC4086511)
Supplement: Supp_Figure1.pdf [file Supp_Figure1.pdf]

## Supplementary Data

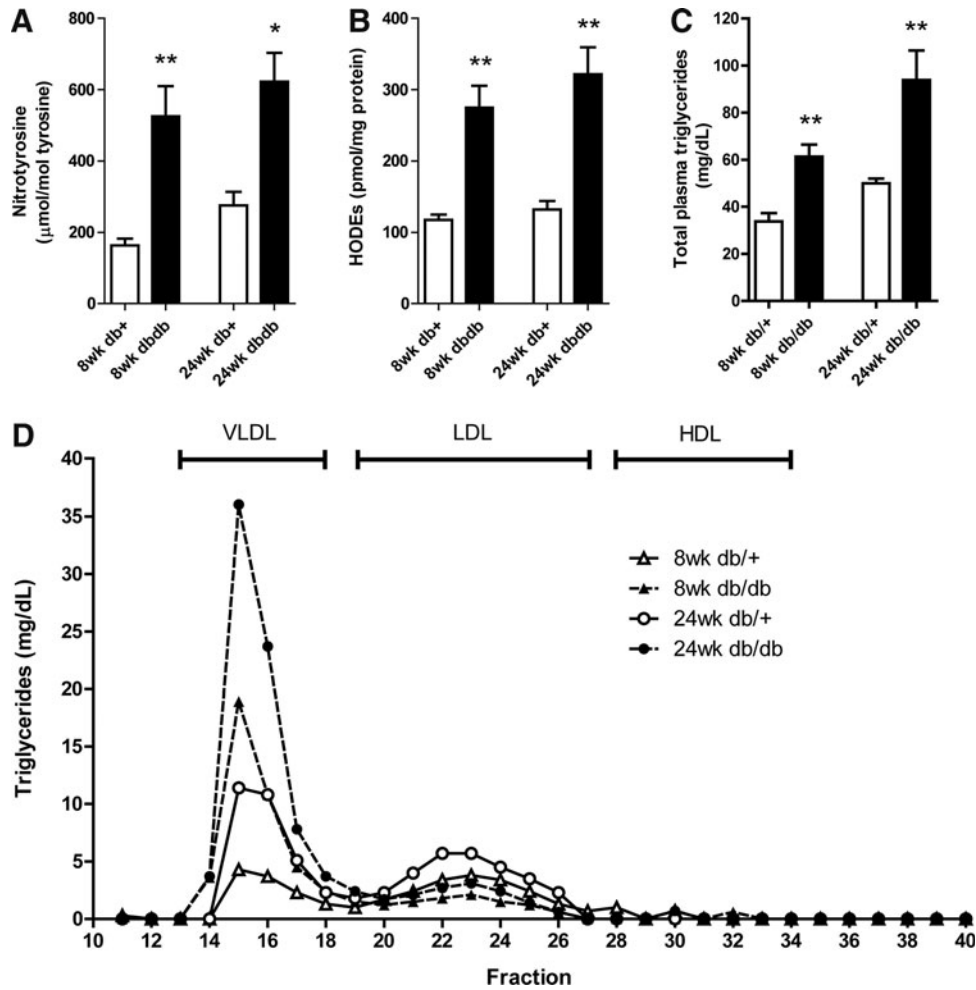

**SUPPLEMENTARY FIG. S1. Terminal metabolic phenotyping and oxidative stress levels in db/+ and db/db mice at 8 and 24 weeks of age.** Protein nitration (nitrotyrosine) (A) and lipid peroxidation (HODEs) (B) were assessed in SCN samples by reverse-phase high-performance liquid chromatography. Nitrotyrosine and HODEs were significantly increased in db/db nerve compared with age-matched controls. Total fasting plasma triglycerides were significantly elevated in db/db mice compared with age-matched controls (C). Fasting plasma samples were pooled for each group and fractionated by FPLC. Total triglycerides were measured in each fraction. Fasting VLDL triglycerides were elevated in db/db mice compared with age-matched controls (D). All data are mean  $\pm$  SEM. \* $p < 0.05$ , \*\* $p < 0.01$  versus age-matched db/+. FPLC, fast protein liquid chromatography; HODEs, hydroxyoctadecadienoic acids; SCN, sciatic nerve; VLDL, very low density lipoprotein.
