# Supplementary material
Source: PubMed Central journal article supplement (PMC4086511)
Supplement: Supp_Figure2.pdf [file Supp_Figure2.pdf]

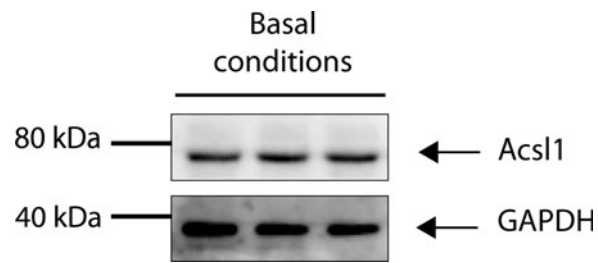

**SUPPLEMENTARY FIG. S2. Primary cultured Schwann cells express Acs11 protein.** Primary Schwann cells were cultured in feed media, then switched to defined media for 12 h prior to harvest and lysis in RIPA buffer containing a protease inhibitor cocktail. A western immunoblot was performed on 30  $\mu$ g protein lysate and probed for Acs11 and GAPDH protein expression. The presented immunoblot showing three replicate Schwann cell lysates confirms that Acs11 protein is constitutively expressed in primary cultured Schwann cells under basal conditions. GAPDH, glyceraldehyde-3-phosphate dehydrogenase.
