# Supplementary material
Source: PubMed Central journal article supplement (PMC4086511)
Supplement: Supp_Figure3.pdf [file Supp_Figure3.pdf]

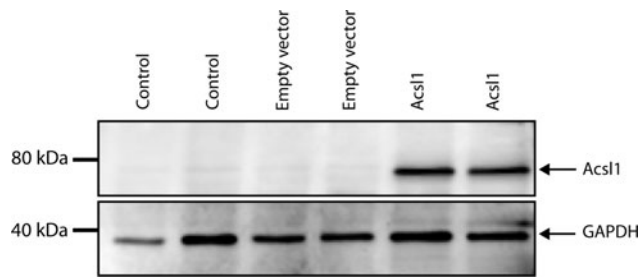

**SUPPLEMENTARY FIG. S3. Confirmation of Acs1 protein overexpression in lentiviral-transduced primary cultured Schwann cells.** Schwann cells were incubated in control feed media (Control), feed media with lentivirus containing an empty vector (Empty vector), or feed media with lentivirus containing an Acs1 construct (Acs1) for 24 h. Cells were subsequently cultured for 7 days in feed media, harvested, and a western immunoblot was performed (5  $\mu$ g of Schwann cell protein lysate) and probed for Acs1 and GAPDH protein expression. Acs1 expression was greater in Schwann cells incubated with the Acs1 construct.
