# Supplementary material
Source: PubMed Central journal article supplement (PMC4086511)
Supplement: Supp_Figure4.pdf [file Supp_Figure4.pdf]

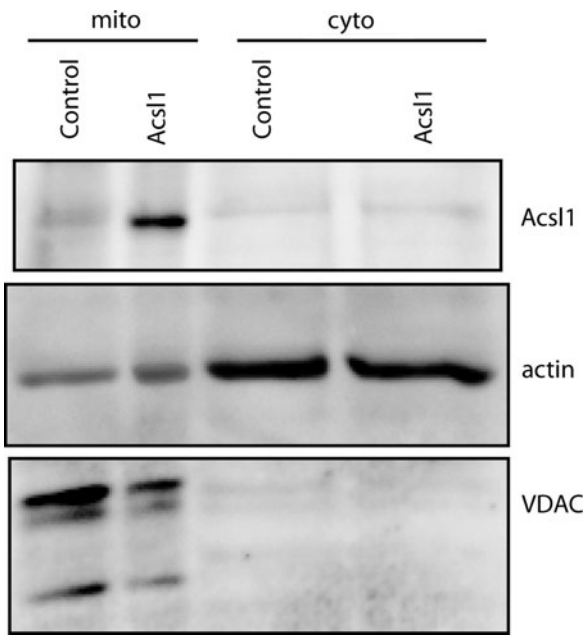

**SUPPLEMENTARY FIG. S4. Lentiviral Acs11 expression is enriched in Schwann cell mitochondria.** Schwann cells were incubated in control feed media (Control) or in feed media with lentivirus containing an *Acs11* construct (Acs11) for 24 h. Cells were subsequently cultured for 7 days in feed media. Cells were harvested for subcellular fractionation, and a western immunoblot was performed on cytosolic (cyto) and mitochondrial (mito) fractions for Acs11, actin, and VDAC protein expression. Mitochondrial fractions from Schwann cells incubated with the *Acs11* construct were enriched for Acs11 protein. VDAC, voltage-dependent anion channel.
