# Supplementary material
Source: PubMed Central journal article supplement (PMC4086511)
Supplement: Supp_Figure5.pdf [file Supp_Figure5.pdf]

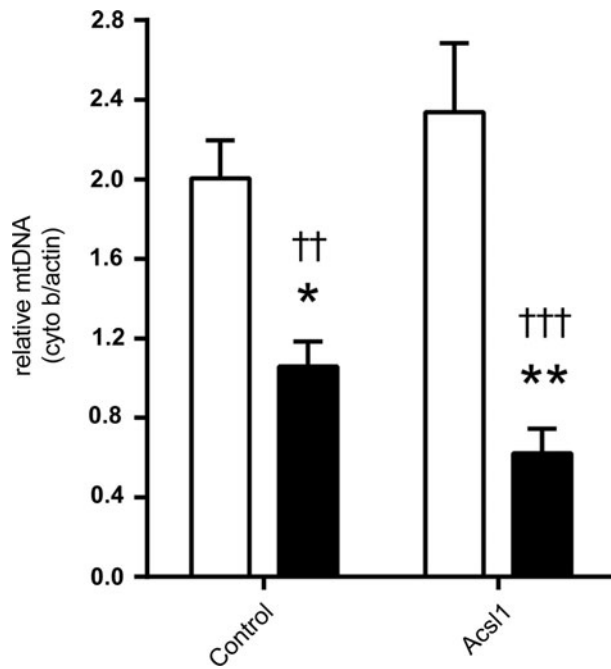

**SUPPLEMENTARY FIG. S5. Mitochondrial DNA is decreased in LCFA-treated Schwann cells.** Control and Acs11-overexpressing Schwann cells were exposed to high LCFAs (100  $\mu$ M; black bars) for 12h. Levels of mtDNA were determined by normalizing the mitochondrial gene, cytochrome b, to the nuclear gene, actin. A total of 10 ng genomic DNA was used for mtDNA and nuclear DNA markers. LCFA treatment significantly decreased mtDNA, with no significant difference between control and Acs11-overexpressing cells. Data are mean  $\pm$  SEM,  $n=3$  replicate cultures, \* $p < 0.05$ , \*\* $p < 0.01$  versus Control cells/control media; †† $p < 0.01$ , ††† $p < 0.001$  versus Acs11. LCFA, long chain fatty acid.
